# Supplementary material
Source: Springer Nature journal article supplement (https://www.springermedizin.de/resource/supplementary/12885_2014_5123_MOESM1_ESM.pdf/9468192)
Supplement: MOESM1 [file 9468192]

1 **Supplemental Table 1.** General characteristics of the study subjects according to the presence of TPOAb

|                                                | TPOAb(IU/mL) |           | P-value |
|------------------------------------------------|--------------|-----------|---------|
|                                                | <30          | ≥30       |         |
| Age (years), mean±SD                           | 49.4±9.1     | 49.5±8.7  | 0.900   |
| Gender                                         |              |           |         |
| Male                                           | 82(31.1)     | 71(29.1)  | 0.630   |
| Female                                         | 182(68.9)    | 173(70.9) |         |
| BMI (kg/m <sup>2</sup> )                       |              |           |         |
| <23                                            | 127(47.2)    | 93(38.0)  | 0.070   |
| 23–<25                                         | 73(27.1)     | 70(28.6)  |         |
| ≥ 25                                           | 69(25.7)     | 82(33.5)  |         |
| Family history of cancer (yes) <sup>a</sup>    | 95(39.8)     | 100(46.1) | 0.172   |
| Smoking status                                 |              |           |         |
| Nonsmoker                                      | 158(65.6)    | 147(68.7) | 0.775   |
| Former smoker                                  | 39(16.2)     | 31(14.5)  |         |
| Current smoker                                 | 44(18.3)     | 36(16.8)  |         |
| Alcohol consumption                            |              |           |         |
| Nondrinker                                     | 95(38.2)     | 83(35.9)  | 0.622   |
| Former drinker                                 | 12(4.8)      | 8(3.5)    |         |
| Current drinker                                | 142(57.0)    | 140(60.6) |         |
| Age at menarche (years) <sup>b</sup>           |              |           |         |
| ≤13                                            | 35(21.9)     | 31(20.7)  | 0.981   |
| 14                                             | 36(22.5)     | 32(21.3)  |         |
| 15                                             | 33(20.6)     | 32(21.3)  |         |
| ≥16                                            | 56(35.0)     | 55(36.7)  |         |
| Menopausal status <sup>b</sup>                 |              |           |         |
| Pre-menopause                                  | 98(54.1)     | 94(54.3)  | 0.971   |
| Post-menopause                                 | 83(45.9)     | 79(45.7)  |         |
| Age at menopause (years) <sup>b</sup>          |              |           |         |
| <46                                            | 15(19.2)     | 13(19.7)  | 0.953   |
| 46–<49                                         | 13(16.7)     | 9(13.6)   |         |
| 49–<52                                         | 19(24.4)     | 18(27.3)  |         |
| ≥52                                            | 31(39.7)     | 26(39.4)  |         |
| Type of menopause <sup>b</sup>                 |              |           |         |
| Natural                                        | 60(74.1)     | 48(61.5)  | 0.091   |
| Surgery, Other                                 | 21(25.9)     | 30(38.5)  |         |
| Postmenopausal hormone use (Ever) <sup>b</sup> | 27(36.0)     | 21(31.8)  | 0.601   |
| Parity (Yes) <sup>b</sup>                      | 160(97.0)    | 156(97.5) | 0.771   |

2 <sup>a</sup>First degree relative

3 <sup>b</sup>Analyzed only among women
